# Supplementary material for: Optimal Landmark for Chest Compressions during Cardiopulmonary Resuscitation Derived from a Chest Computed Tomography in Arms-Down Position
Source: MDPI journal article supplement (doi:10.3390/jcdd9040100), 2022-03-27
Supplement: s1 [file s1]

## Supplementary Materials

**Title:** Optimal Landmark for Chest Compressions During Cardiopulmonary Resuscitation  
Derived from a Chest Computed Tomography in Arms-Down Position

### TABLE OF CONTENTS

|                                                                                                                   | Page |
|-------------------------------------------------------------------------------------------------------------------|------|
| <b>Table S1</b> Measurement of Rescuer's Hand.                                                                    | 2    |
| <b>Figure S1</b> Rescuer's Hand Measurement.                                                                      | 3    |
| <b>Figure S2</b> Optimal Landmarks for Chest Compressions.                                                        | 4    |
| <b>Figure S3</b> Optimal Landmark for Chest Compressions: Add one fingerbreadth below the xiphisternal junction.  | 6    |
| <b>Figure S4</b> Optimal Landmark for Chest Compressions: Add two fingerbreadths below the xiphisternal junction. | 8    |
| <b>Figure S5</b> Summary of the Optimal Landmark for Chest Compressions by Modified Bland-Altman Plots.           | 10   |

**Table S1** Measurement of Rescuer's Hand

| Measurement<br>(centimeter)*                              | Right hand<br>(n = 69) | Left hand<br>(n = 69) | Difference | 95% CI      | p-value |
|-----------------------------------------------------------|------------------------|-----------------------|------------|-------------|---------|
| Width of hand's heel                                      | 7.9 ± 0.9              | 7.9 ± 0.8             | 0          | -0.1 to 0.1 | 0.431   |
| Width of radial border' heel<br>to point of maximal force | 5.4 ± 0.6              | 5.8 ± 0.6             | 0.3        | 0.3 to 0.4  | <0.001  |

Abbreviations: 95% *CI*, 95% confidence interval.

\* mean ± standard deviation and analyzed with paired t-test.

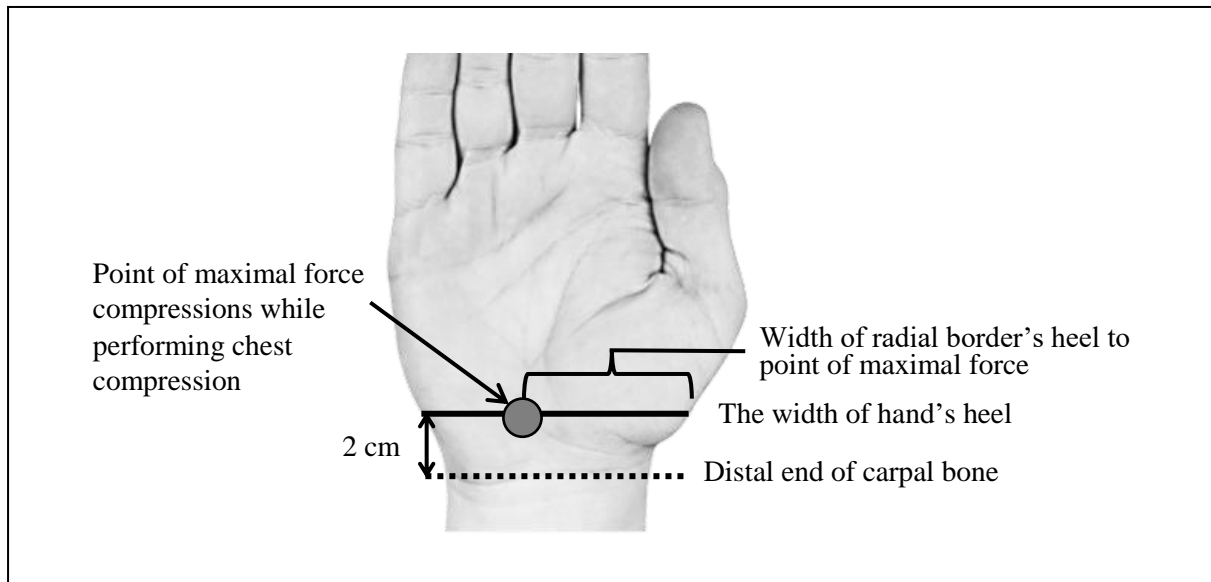

**Figure S1** Rescuer's Hand Measurement

Abbreviations: *cm*, centimeter.

A. Rescuer at right side of patient with left hand down.

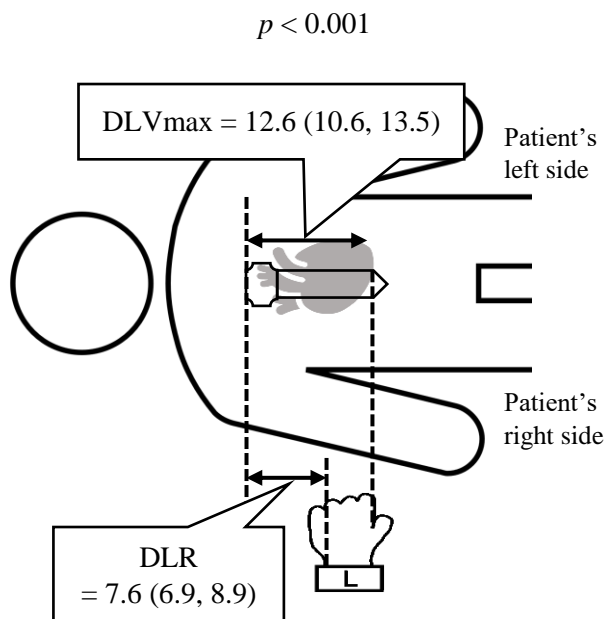

B. Rescuer at right side of patient with right hand down.

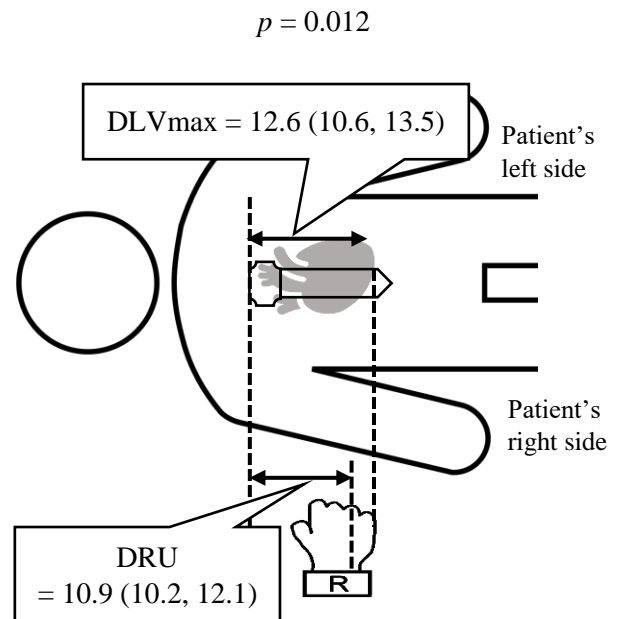

C. Rescuer at left side of patient with left hand down.

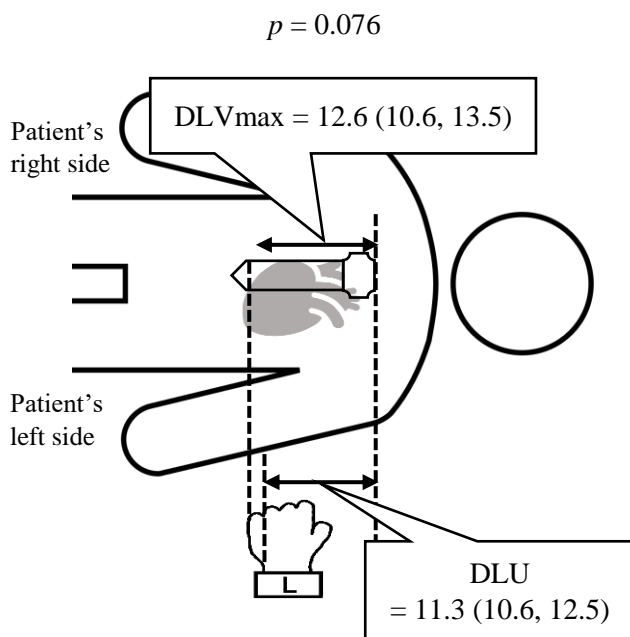

D. Rescuer at left side of patient with right hand down.

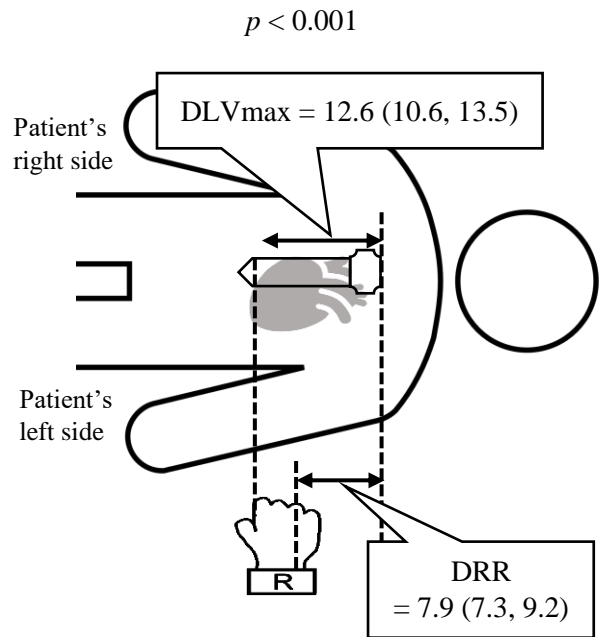

### Legends

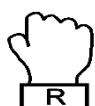

Rescuer's right  
hand down

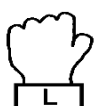

Rescuer's left  
hand down

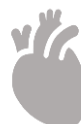

Patient's heart

**Figure S2** Optimal Landmarks for Chest Compressions. The distances showed as median (interquartile range) in centimeters. Differences were analyzed with Wilcoxon signed-rank test.

Abbreviations: *DLVmax*, distance from the sternal notch to the point of maximal left ventricular diameter on the sternum; *DLR*, distance from the sternal notch to the point of maximal force of the rescuer's left hand with the radial border located at the xiphisternal junction; *DLU*, distance from the sternal notch to the point of maximal force of the rescuer's left hand with the ulnar border located at the xiphisternal junction; *DRR*, distance from the sternal notch to the point of maximal force of the rescuer's right hand with the radial border located at the xiphisternal junction; *DRU*, distance from the sternal notch to the point of maximal force of the rescuer's right hand with the ulnar border located at the xiphisternal junction; *95% CI*, 95% confidence interval.

A. Rescuer at right side of patient with left hand down.

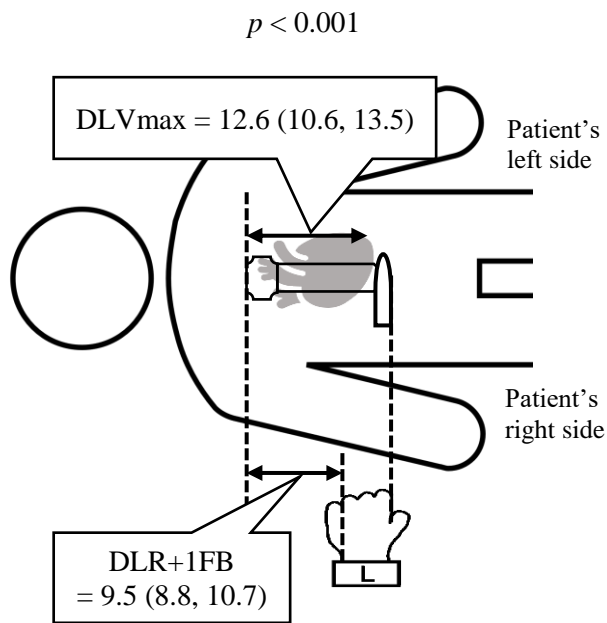

B. Rescuer at right side of patient with right hand down.

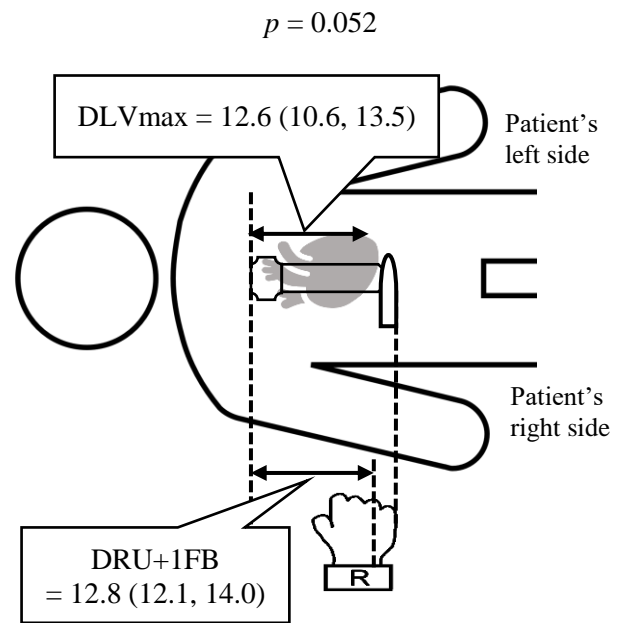

C. Rescuer at left side of patient with left hand down.

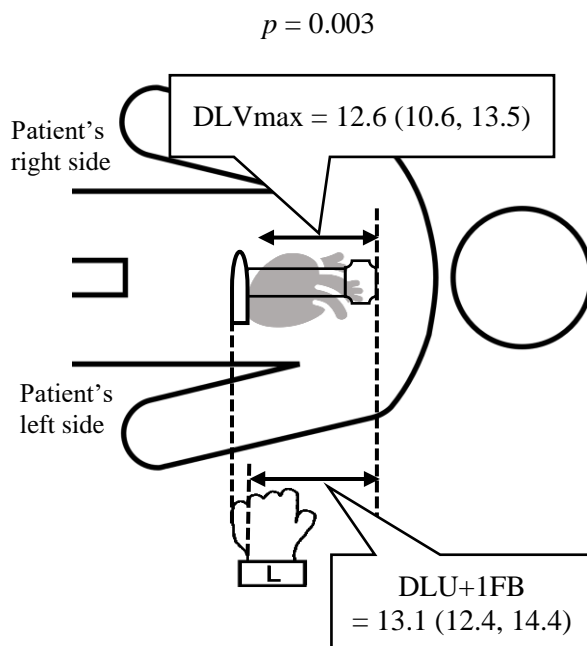

D. Rescuer at left side of patient with right hand down.

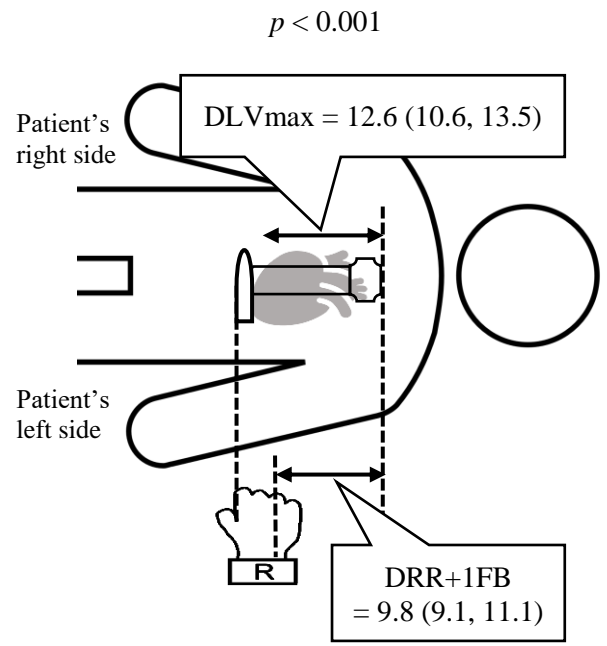

### Legends

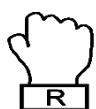

Rescuer's right hand down

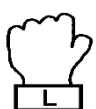

Rescuer's left hand down

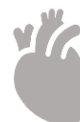

Patient's heart

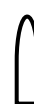

Rescuer's one fingerbreadth

**Figure S3** Optimal Landmark for Chest Compressions: Add one fingerbreadth below the xiphisternal junction. The distances showed as median (interquartile range) in centimeter. Differences were analyzed with Wilcoxon signed-rank test.

Abbreviations: *DLVmax*, distance from the sternal notch to the point of maximal left ventricular diameter on the sternum; *DLR + IFB*, distance from the sternal notch to the point of maximal force of the rescuer's left hand with the radial border located at below the xiphisternal junction one fingerbreadth; *DLU + IFB*, distance from the sternal notch to the point of maximal force of the rescuer's left hand with the ulnar border located at below the xiphisternal junction one fingerbreadth; *DRR + IFB*, distance from the sternal notch to the point of maximal force of the rescuer's right hand with the radial border located at below the xiphisternal junction one fingerbreadth; *DRU + IFB*, distance from the sternal notch to the point of maximal force of the rescuer's right hand with the ulnar border located at below the xiphisternal junction one fingerbreadth; *95% CI*, 95% confidence interval.

A. Rescuer at right side of patient with left hand down.

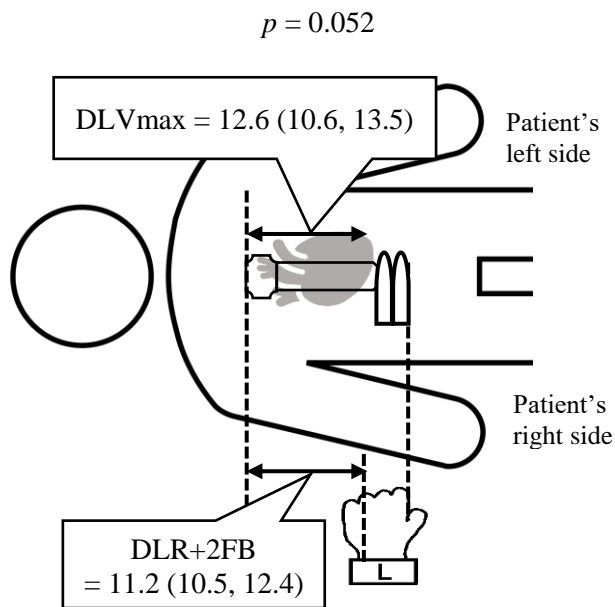

B. Rescuer at right side of patient with right hand down.

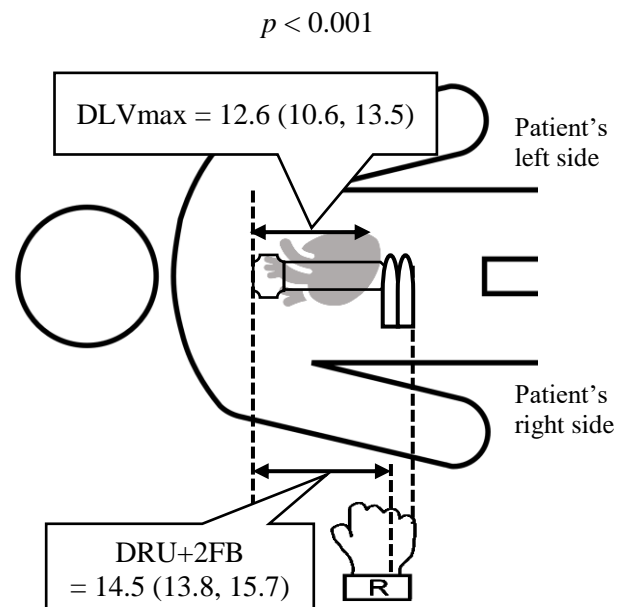

C. Rescuer at left side of patient with left hand down.

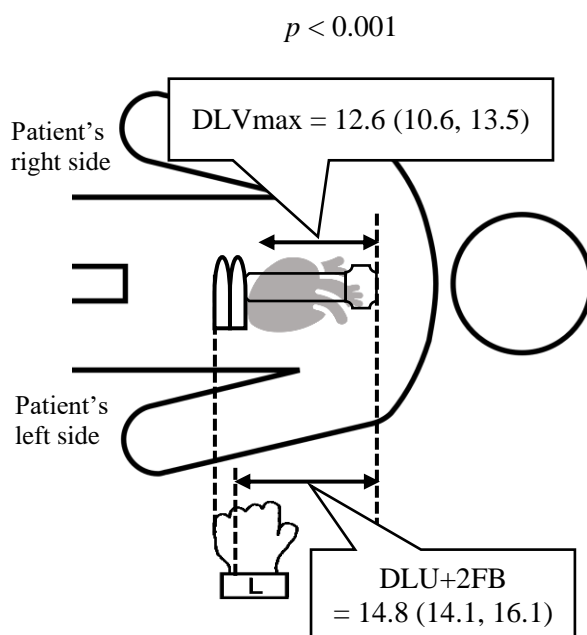

D. Rescuer at left side of patient with right hand down.

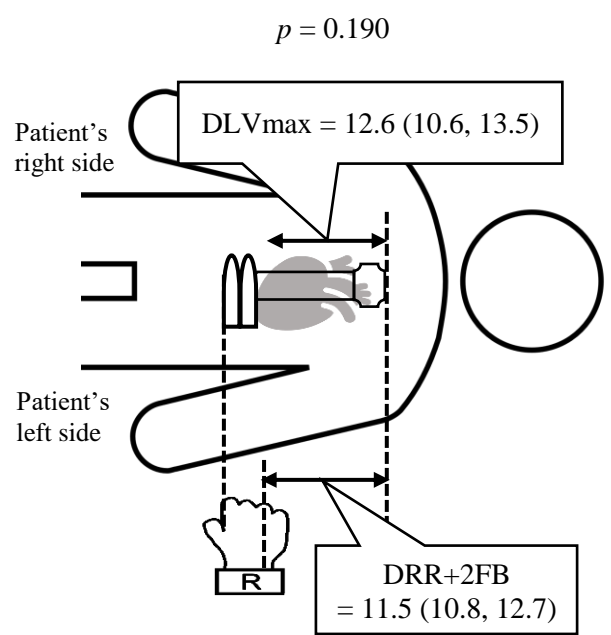

### Legends

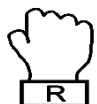

Rescuer's right hand down

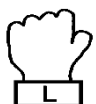

Rescuer's left hand down

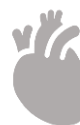

Patient's heart

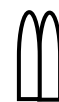

Rescuer's two fingerbreadths

**Figure S4** Optimal Landmark for Chest Compressions: Add two fingerbreadths below the xiphisternal junction. The distances showed as median (interquartile range) in centimeter.

Differences were analyzed with Wilcoxon signed-rank test.

Abbreviations: *DLVmax*, distance from the sternal notch to the point of maximal left ventricular diameter on the sternum; *DLR + 2FB*, distance from the sternal notch to the point of maximal force of the rescuer's left hand with the radial border located at below the xiphisternal junction two fingerbreadths; *DLU + 2FB*, distance from the sternal notch to the point of maximal force of the rescuer's left hand with the ulnar border located at below the xiphisternal junction two fingerbreadths; *DRR + 2FB*, distance from the sternal notch to the point of maximal force of the rescuer's right hand with the radial border located at below the xiphisternal junction two fingerbreadths; *DRU + 2FB*, distance from the sternal notch to the point of maximal force of the rescuer's right hand with the ulnar border located at below the xiphisternal junction two fingerbreadths; *95% CI*, 95% confidence interval.

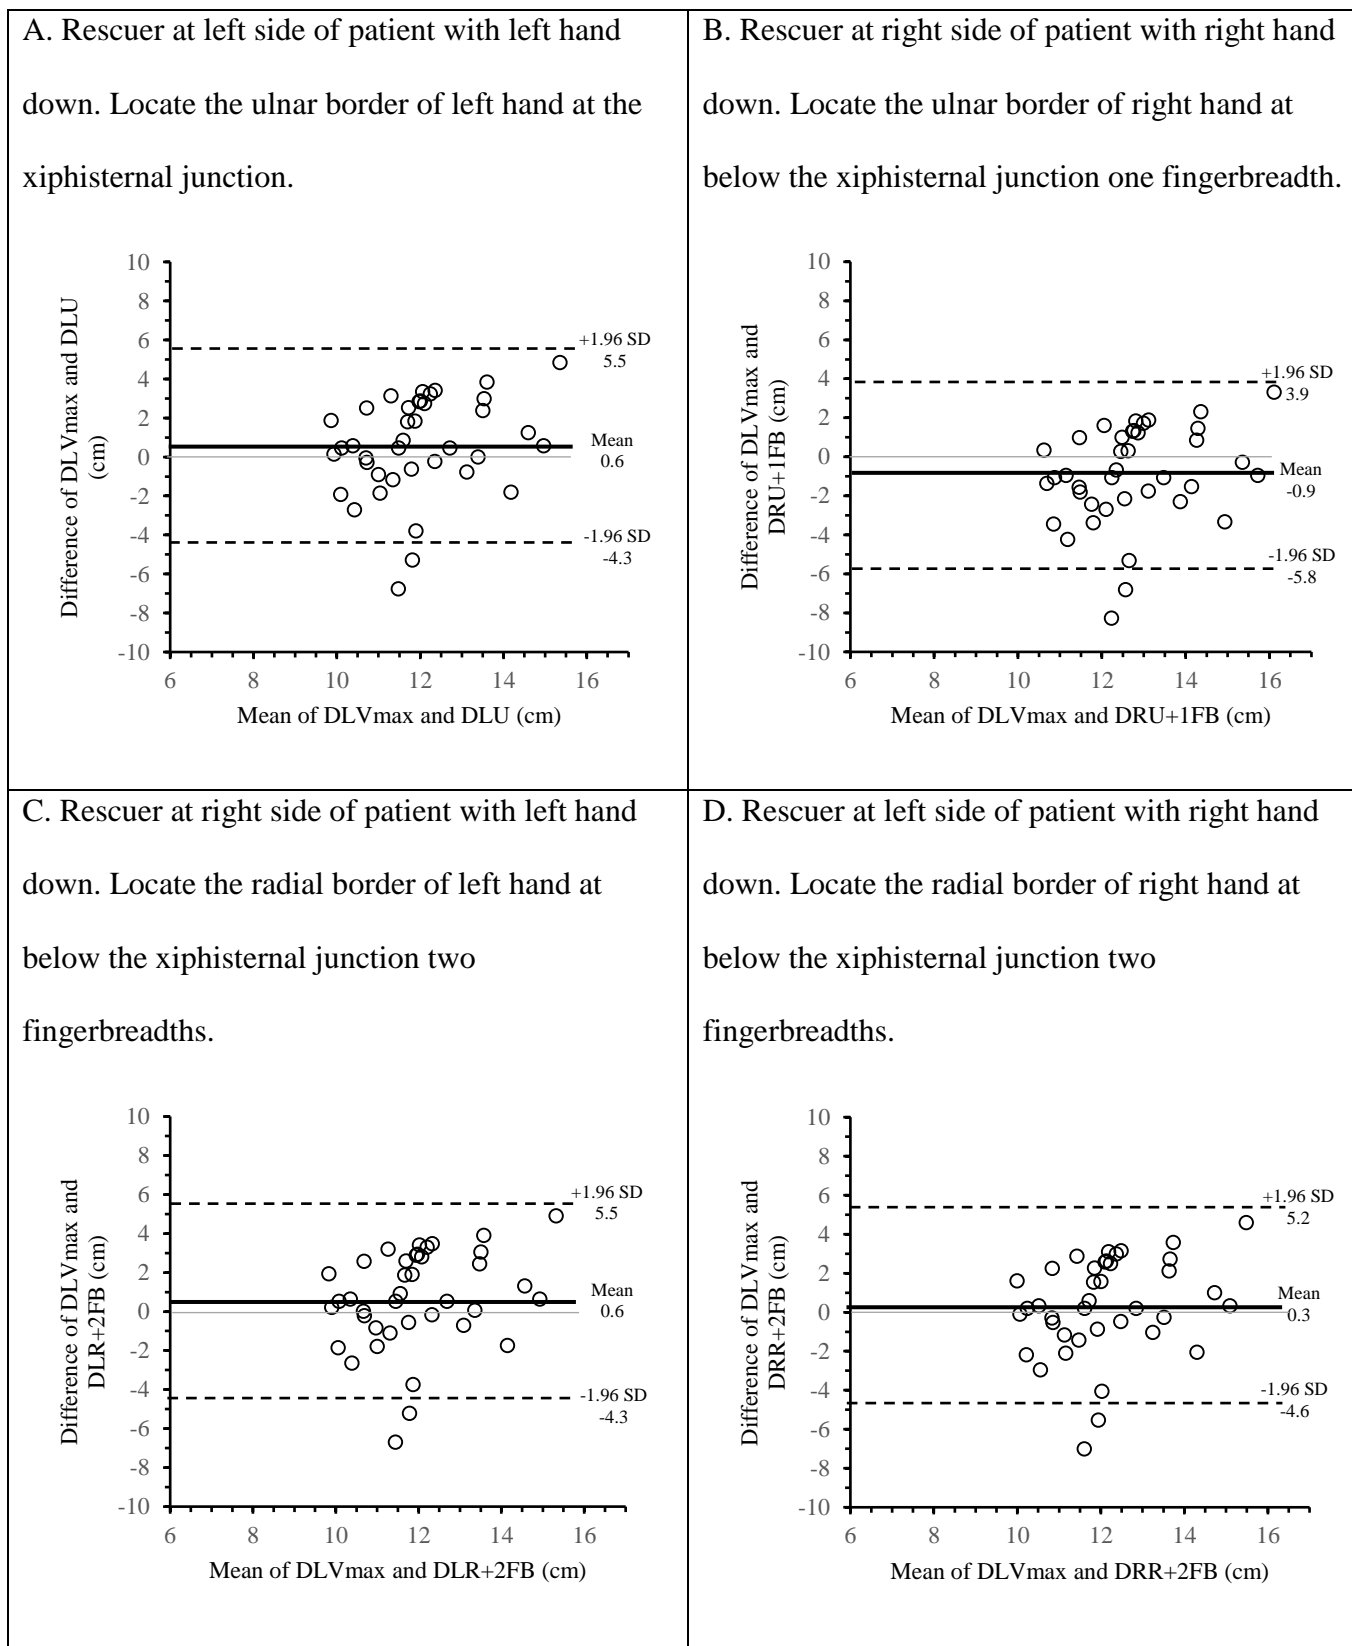

**Figure S5** Summary of the Optimal Landmark for Chest Compressions by Modified Bland-Altman Plots. Horizontal axes are mean of DLVmax and DLU, DRU + 1FB, DLR + 2FB or DRR + 2FB. Vertical axes are differences of DLVmax and DLU, DRU + 1FB, DLR + 2FB or DRR + 2FB. Horizontal solid lines are mean of those differences. Two dashed lines are

+1.96 and -1.96 of standard deviations of those differences. Shapiro-Wilk test is checked to ensure normal distribution of those differences and able to use standard deviation to define limits of agreement.

Abbreviations: *DLVmax*, distance from the sternal notch to the point of maximal left ventricular diameter on the sternum; *DLU*, distance from the sternal notch to the point of maximal force of the rescuer's left hand with the ulnar border located at the xiphisternal junction; *DRU + 1FB*, distance from the sternal notch to the point of maximal force of the rescuer's right hand with the ulnar border located at below the xiphisternal junction one fingerbreadth; *DLR + 2FB*, distance from the sternal notch to the point of maximal force of the rescuer's left hand with the radial border located at below the xiphisternal junction two fingerbreadths; *DRR + 2FB*, distance from the sternal notch to the point of maximal force of the rescuer's right hand with the radial border located at below the xiphisternal junction two fingerbreadths; *cm*, centimeter; *SD*, standard deviation.
